# Supplementary material for: Urban-Rural Disparities in Health Facility Deliveries in Nigeria (2007–2021): Decomposition and Concentration Index Analyses
Source: Research Square preprint supplement (doi:10.21203/rs.3.rs-6868032/v1), 2025-07-01
Supplement: Supplementary file 1 [file 987f5a91212362c37f97ca83.docx]

**Extended Concentration Index table**

| **Period** | **Urban** | | | **Rural** | | |
| --- | --- | --- | --- | --- | --- | --- |
| **CI Value** | **Standard Error** | **P-value** | **CI Value** | **Standard Error** | **P-value** |
| Pooled | 0.3593 | 0.0061 | 0.0000 | 0.3806 | 0.0059 | 0.0000 |
| 2007 | 0.4736 | 0.0319 | 0.0000 | 0.3883 | 0.0208 | 0.0000 |
| 2011 | 0.5282 | 0.0252 | 0.0000 | 0.6014 | 0.0120 | 0.0000 |
| 2016-17 | 0.3035 | 0.0244 | 0.0000 | 0.4847 | 0.0147 | 0.0000 |
| 2021 | 0.4666 | 0.0363 | 0.0000 | 0.2302 | 0.0256 | 0.0000 |

**Year-by-Year Contributions of Predictors to Rural–Urban Disparities in Health Facility Delivery**

| **Variable** | **2007** | | | | **2011** | | | | **2016** | | | | **2021** | | | |
| --- | --- | --- | --- | --- | --- | --- | --- | --- | --- | --- | --- | --- | --- | --- | --- | --- |
| % Contribution | p-value | 95% CI (Lower) | 95% CI (Upper) | % Contribution | p-value | 95% CI (Lower) | 95% CI (Upper) | % Contribution | p-value | 95% CI (Lower) | 95% CI (Upper) | % Contribution | p-value | 95% CI (Lower) | 95% CI (Upper) |
| Wealth Score | +49.6*** | 0 | 26.5 | 72.6 | -55.3*** | 0 | -63.6 | -46.9 | -44.6*** | 0 | -61.5 | -27.8 | -24.7*** | 0 | -37.7 | -11.7 |
| Education: Primary | -2.4 | 0.149 | -5.6 | 0.8 | +1.6** | 0.017 | 0.3 | 2.8 | 1.4 | 0.116 | -0.3 | 3.2 | -3.3*** | 0.004 | -5.5 | -1.1 |
| Education: Secondary+ | +9.4* | 0.09 | -0.7 | 20.2 | -22.8*** | 0 | -28.3 | -17.3 | -18.3*** | 0 | -26.8 | -9.8 | -8.6*** | 0 | -12.2 | -4.9 |
| ANC Visits | +9.1*** | 0.007 | 2.5 | 15.7 | -9.3*** | 0 | -14.5 | -4.1 | -5.3*** | 0.006 | -9 | -1.5 | -3.5 | 0.164 | -8.4 | 1.4 |
| Children Ever Born | +7.0** | 0.028 | 0.8 | 13.2 | +2.2* | 0.069 | -0.2 | 4.6 | +4.2*** | 0 | 1.9 | 6.5 | -0.1 | 0.91 | -2.4 | 2.2 |
| Maternal Age | 2.1 | 0.125 | -0.6 | 4.7 | +1.4** | 0.041 | 0.1 | 2.8 | +3.4*** | 0 | 1.5 | 5.3 | -2.8 | 0.103 | -6.1 | 0.6 |
| Married | -1 | 0.232 | -2.6 | 0.6 | 0.01 | 0.951 | -0.3 | 0.3 | -0.01 | 0.936 | -0.3 | 0.3 | -0.3 | 0.321 | -0.9 | 0.3 |
| North East | -0.1 | 0.863 | -1.7 | 1.4 | +9.9*** | 0 | 7.3 | 12.5 | +9.3*** | 0 | 5.8 | 12.8 | +3.8*** | 0 | 1.7 | 6 |
| North West | +13.3*** | 0 | 9.7 | 16.9 | +8.0*** | 0 | 6.2 | 9.9 | +3.4*** | 0.002 | 1.3 | 5.5 | +7.5*** | 0 | 3.9 | 11.1 |
| South East | -3.8* | 0.09 | -8.3 | 0.6 | -2.1*** | 0.001 | -3.3 | -0.9 | -1.6*** | 0.004 | -2.7 | -0.5 | +4.4** | 0.022 | 0.6 | 8.2 |
| South South | 1.6 | 0.507 | -3 | 6.3 | -0.5 | 0.207 | -1.4 | 0.3 | 1 | 0.066 | -0.1 | 2.1 | 0.2 | 0.702 | -0.9 | 1.3 |
| South West | -5.6 | 0.5 | -22 | 10.8 | 4.6 | 0.279 | -3.7 | 12.9 | +7.7* | 0.077 | -0.8 | 16.2 | +14.4*** | 0 | 7.3 | 21.6 |
| Currently Pregnant | 0.2 | 0.481 | -0.4 | 0.8 | -0.2 | 0.258 | -0.5 | 0.1 | 0.3 | 0.213 | -0.2 | 0.8 | -0.1 | 0.774 | -0.5 | 0.4 |

(∗p<0.1, ∗∗p<0.05, ∗∗∗p<0.01)
